# Supplementary material for: A giant intrinsic photovoltaic effect in atomically thin ReS2
Source: Royal Society of Chemistry journal article supplement (doi:10.1039/d3nr05355e), 2024-01-01
Supplement: d3nr05355e1.pdf [file d3nr05355e1.pdf]

Supporting Information

# Giant intrinsic photovoltaic effect in atomically thin ReS<sub>2</sub>

*Jing Wang,<sup>a</sup> Nannan Han,<sup>\*b</sup> Zhihua Lin,<sup>b</sup> Siqi Hu,<sup>a</sup> Ruijuan Tian,<sup>a</sup> Mingwen Zhang,<sup>a</sup> Yu Zhang,<sup>a</sup> Jianlin Zhao<sup>a</sup> and Xuetao Gan<sup>\*a</sup>*

a. Key Laboratory of Light Field Manipulation and Information Acquisition, Ministry of Industry and Information Technology, and Shaanxi Key Laboratory of Optical Information Technology, School of Physical Science and Technology, Northwestern Polytechnical University, Xi'an, 710129 China

b. Frontiers Science Center for Flexible Electronics, Institute of Flexible Electronics, Northwestern Polytechnical University, Xi'an 710072, China

\*E-mail: [xuetaogan@nwpu.edu.cn](mailto:xuetaogan@nwpu.edu.cn)

\*E-mail: [iamnnhan@nwpu.edu.cn](mailto:iamnnhan@nwpu.edu.cn)

## 1. Second harmonic generation (SHG) in tetralayer ReS<sub>2</sub>

Fig. S1a shows the optical microscope image of the fabricated tetralayer ReS<sub>2</sub> photovoltaic (PV) device. The SHG characteristic of the individual tetralayer ReS<sub>2</sub> (marked by the red star in Fig. S1a) was evaluated under a home-built vertical microscope setup with the reflection geometry. A fiber-based picosecond pulsed laser was employed as the fundamental pump radiation, which has a central wavelength around 1550 nm, a repetition rate of 18.5 MHz and a pulse width of 8.8 ps. The pulsed laser was focused by a 50× objective lens with a numerical aperture of 0.75 into a spot size about 2 μm on the sample. The SHG response scattered from the sample was collected by the same objective lens, which was then examined by a spectrometer mounted with a cooled silicon CCD camera. The collected spectra from tetralayer ReS<sub>2</sub> at the range around the half of the pump wavelength are plotted in Fig. S1b. The strong SHG signal indicates that the tetralayer ReS<sub>2</sub> is non-centrosymmetry.<sup>1-3</sup>

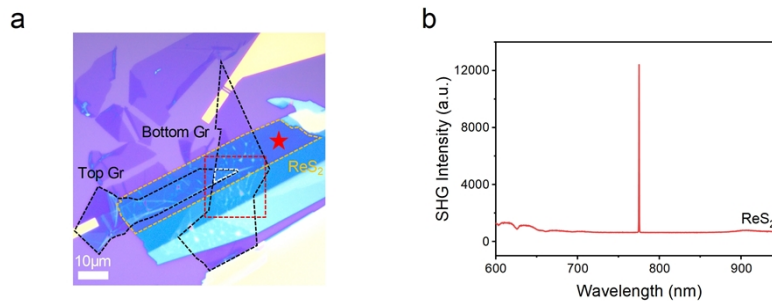

**Fig. S1** (a) Optical microscope image of the fabricated tetralayer ReS<sub>2</sub> PV device. (b) SHG spectra measured from the individual tetralayer ReS<sub>2</sub> marked by the red star in Fig. S1a.

## 2. Atomic force microscopy (AFM) of the tetralayer ReS<sub>2</sub>

The layer number of ReS<sub>2</sub> in Fig. 1b is also confirmed by the atomic force microscopy (AFM), as shown in Fig. S2. The inset shows the height data measured along the white dotted line with a value of ~3.309 nm, corresponding to the thickness of tetralayer.

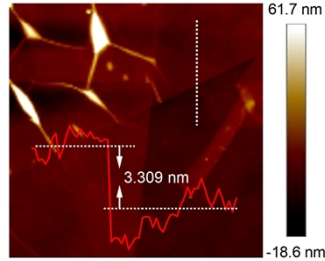

**Fig. S2** AFM image of the tetralayer ReS<sub>2</sub>.

### 3. Electrical characteristics in tetralayer ReS<sub>2</sub>

The electrical characteristics of the device in Fig. 1b under different gate voltages without laser illumination are shown in Fig. S3. By applying source-drain voltages ( $V_{DS}$ ) from -1 to 1 mV, the obtained source-drain currents ( $I_{DS}$ ) under different gate voltages ( $V_G$ ) are shown in Fig. S3a. Under different  $V_G$ , the  $I_{DS} - V_{DS}$  curves all show linear and symmetric cross the origin. We calculated the rectification ratios under different  $V_G$ , as shown in Fig. S3b. The rectification ratios under different  $V_G$  are all almost equal to one. The results above indicate that even though there are different electrostatic dopings of the bottom graphene under different  $V_G$ , the top and bottom graphene electrodes are symmetric and have good Ohmic contact with ReS<sub>2</sub>.

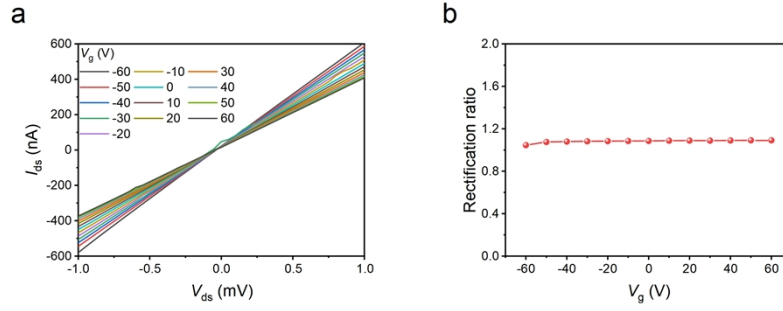

**Fig. S3** (a)  $I_{DS} - V_{DS}$  curves of the tetralayer  $\text{ReS}_2$  based PV device as measured under different  $V_G$  in dark conditions. (b) Rectification ratios extracted from the results in (a).

#### 4. Absorption characteristics of tetralayer $\text{ReS}_2$

We perform differential reflection measurements to characterize the absorption properties of the tetralayer  $\text{ReS}_2$  on the  $\text{SiO}_2$  substrate. The result is shown in Fig. S4. Here, the differential reflection is defined as  $\Delta R/R_0 = (R - R_0)/R_0$ , where  $R$  and  $R_0$  are the reflectances of the  $\text{ReS}_2$  sample and the  $\text{SiO}_2$  substrate, respectively. Because of the interfering reflection of the 300-nm-thick  $\text{SiO}_2$  substrate, the optical absorption of the tetralayer  $\text{ReS}_2$  is enhanced around the wavelength of 530 nm. Therefore, the PV effect of the tetralayer  $\text{ReS}_2$  is strongest at around 530 nm.

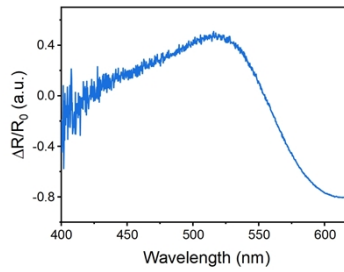

**Fig. S4** Differential reflection spectrum of the tetralayer  $\text{ReS}_2$ .

#### 5. Dynamic response in the tetralayer $\text{ReS}_2$ device

The response time can be obtained by analyzing the rise time ( $\tau_r$ ) and fall time ( $\tau_f$ ) of rising and falling edges, estimated between 10% and 90% of the maximum  $I_{sc}$ . Therefore, the  $\tau_r/\tau_f$  was calculated to be 146/125  $\mu\text{s}$  with the laser illumination modulated at 500 Hz, as shown in Fig. S5a. Fig. S5b shows the dynamic response of the photocurrent in tetralayer  $\text{ReS}_2$  device illuminated with the laser modulated at 4 kHz, and the  $\tau_r/\tau_f$  was calculated to be 70.2/79.4  $\mu\text{s}$ , as shown in Fig. S5c.

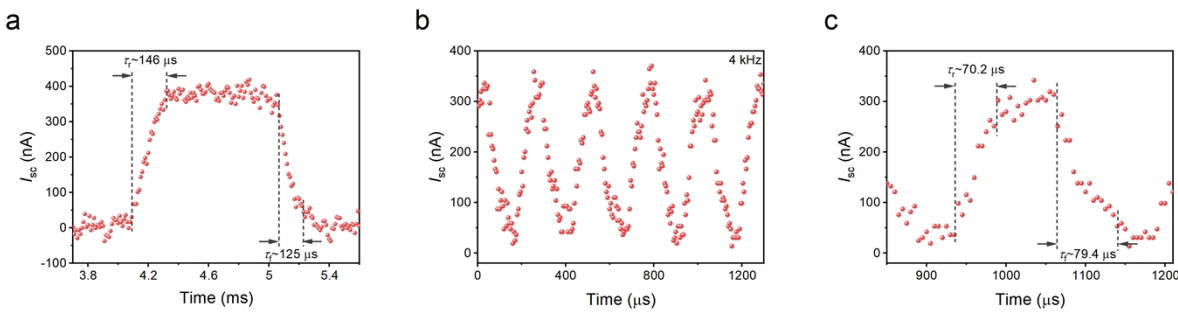

**Fig. S5** (a) Rising and falling edges for estimating the rise time ( $\tau_r$ ) and the fall time ( $\tau_f$ ) at the laser on/off modulation frequency of 500 Hz. (b) Dynamic response of the photocurrent at the laser on/off modulation frequency of 4 kHz. (c) Rising and falling edges for estimating the rise time ( $\tau_r$ ) and the fall time ( $\tau_f$ ) at the laser on/off modulation frequency of 4 kHz.

## 6. PV effect in six-layer $\text{ReS}_2$

The optical microscope image of the six-layer  $\text{ReS}_2$  PV device is shown in Fig. S6a. The SHG spectra of the individual six-layer  $\text{ReS}_2$  marked by the red star in Fig. S6a is shown in Fig. S6b. The strong SHG signal indicates that the six-layer  $\text{ReS}_2$  is non-centrosymmetry.<sup>1-3</sup> Fig. S6c shows the Raman spectroscopy of  $\text{ReS}_2$  in Fig. S6a. The characteristic peak of 29.10  $\text{cm}^{-1}$  in the ultralow-frequency spectrum indicates that the layer number of  $\text{ReS}_2$  in Fig. S6a is six. In the high-frequency

spectrum, the characteristic peaks of 160.86, 212.47 and 235.85  $\text{cm}^{-1}$  are consistent with the results of  $\text{ReS}_2$  in the previous literature.<sup>4</sup>

Without illumination, the obtained source-drain currents ( $I_{\text{DS}}$ ) with the source-drain voltages ( $V_{\text{DS}}$ ) between -1 and 1 mV were shown in the black curve in Fig. S6d. The linear  $I_{\text{DS}} - V_{\text{DS}}$  curve crosses the origin indicating the good Ohmic contacts between the multilayer graphene electrodes and the  $\text{ReS}_2$  channel. When illuminated the sandwich structure region with the laser wavelength of 532 nm, the linear  $I_{\text{DS}} - V_{\text{DS}}$  curve was shifted upwards significantly, indicating a non-negligible PV behavior, as shown in the red curve in Fig. S6d.

The laser polarization dependence of  $I_{\text{sc}}$  in six-layer  $\text{ReS}_2$  is shown in Fig. S6e. The result is anisotropic with no sign change when rotating the polarization direction, which is attributed to the in-plane non-centrosymmetry of six-layer  $\text{ReS}_2$ . Fig. S6f shows the laser power dependence of  $I_{\text{sc}}$  in six-layer  $\text{ReS}_2$ . Same as that in tetralayer  $\text{ReS}_2$ , the laser power dependence of  $I_{\text{sc}}$  in the six-layer  $\text{ReS}_2$  still shows linear feature even under high power intensity. This unique characteristic indicates the depolarization field should be the dominant mechanism of the PV effect generation in atomically thin  $\text{ReS}_2$ .<sup>5</sup>

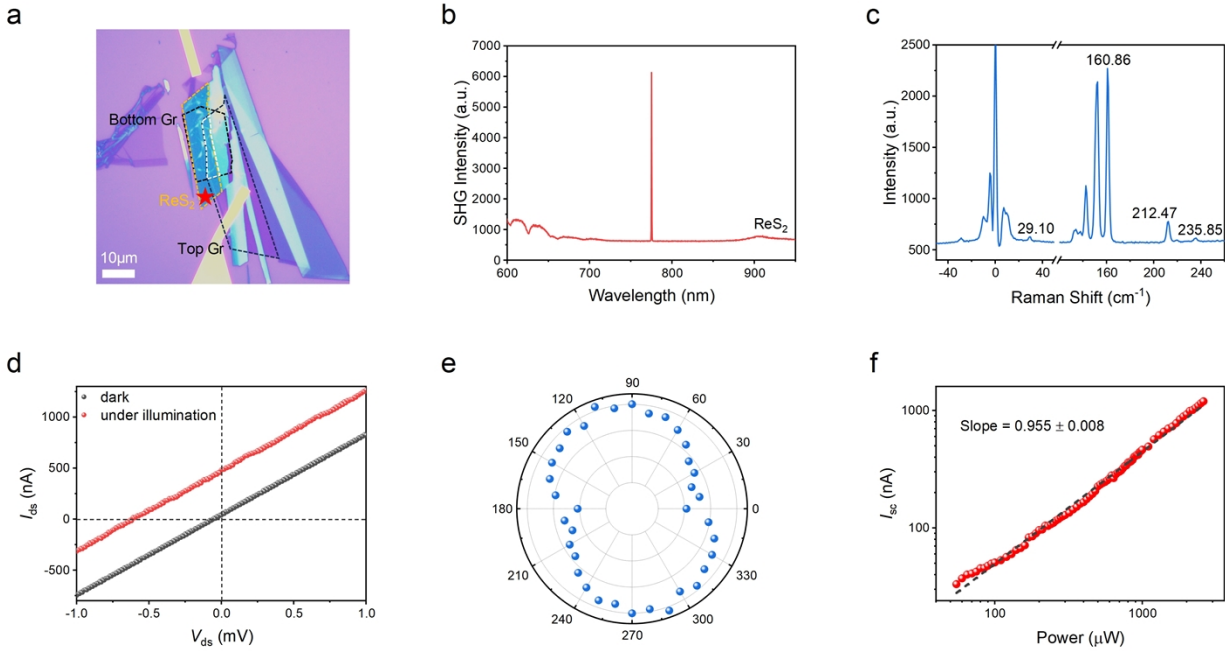

**Fig. S6** (a) Optical microscope image of the six-layer ReS<sub>2</sub> PV device. (b) SHG spectra measured from the individual six-layer ReS<sub>2</sub> marked by the red star in Fig. S6a. (c) Raman spectrum of the six-layer ReS<sub>2</sub> in Fig. S6a. (d)  $I_{DS} - V_{DS}$  curves of the six-layer ReS<sub>2</sub> PV device as measured in dark (black) and illuminated ( $\lambda = 532$  nm, red) conditions. (e) Polar plot of  $I_{sc}$  with respect to the polarization of the pump laser measured from the six-layer ReS<sub>2</sub> PV device. (f) Laser power dependence of  $I_{sc}$  in six-layer ReS<sub>2</sub>.

## 7. PV effect in trilayer ReS<sub>2</sub>

The optical microscope image of the trilayer ReS<sub>2</sub> PV device is shown in Fig. S7a. The SHG spectra of the individual trilayer ReS<sub>2</sub> marked by the red star in Fig. S7a is shown in Fig. S7b. The nearly no measurable SHG signal indicates that the trilayer ReS<sub>2</sub> is centrosymmetry.<sup>1-3</sup> Fig. S7c shows the Raman spectroscopy of ReS<sub>2</sub> in Fig. S7a. The characteristic peak of 21.31 cm<sup>-1</sup> in the ultralow-frequency spectrum indicates that the layer number of ReS<sub>2</sub> in Fig. S7a is three. In the

high-frequency spectrum, the characteristic peaks of 160.86, 211.71 and 236.60  $\text{cm}^{-1}$  are consistent with the results of  $\text{ReS}_2$  in the previous literature.<sup>4</sup>

Without illumination, the obtained source-drain currents ( $I_{\text{DS}}$ ) with the source-drain voltages ( $V_{\text{DS}}$ ) between -1 and 1 mV were shown in the black curve in Fig. S7d. The linear  $I_{\text{DS}} - V_{\text{DS}}$  curve crosses the origin indicates the good Ohmic contacts between the multilayer graphene electrodes and the  $\text{ReS}_2$  channel. When illuminated the sandwich structure region with the laser wavelength of 532 nm, the linear  $I_{\text{DS}} - V_{\text{DS}}$  curve keep almost unchanged, indicating no obvious PV behavior, as shown in the red curve in Fig. S7d. These results illustrate the centrosymmetry-breaking is essential for the PV effect generation in atomically thin  $\text{ReS}_2$ .

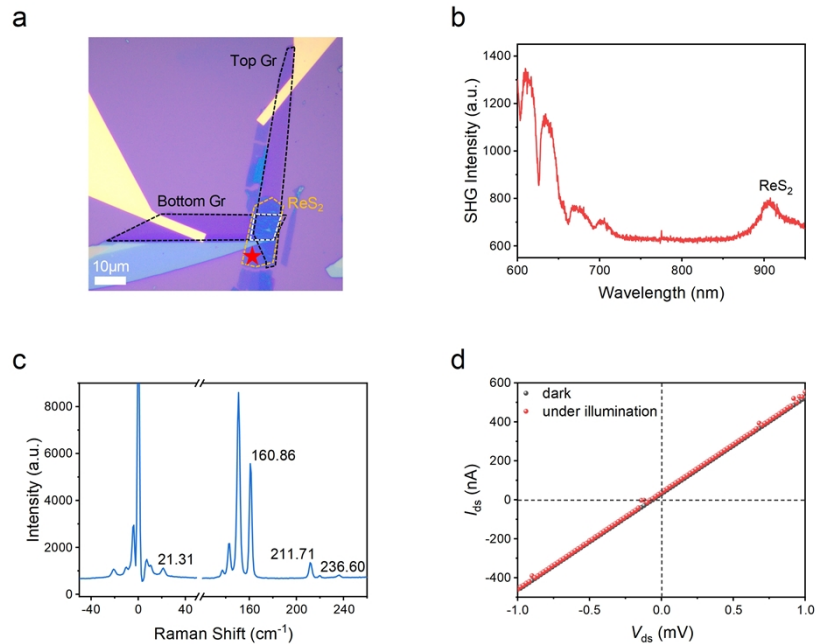

**Fig. S7** (a) Optical microscope image of the trilayer  $\text{ReS}_2$  PV device. (b) SHG spectra measured from the individual trilayer  $\text{ReS}_2$  marked by the red star in Fig. S7a. (c) Raman spectrum of the trilayer  $\text{ReS}_2$  in Fig. S7a. (d)  $I_{\text{DS}} - V_{\text{DS}}$  curves of the trilayer  $\text{ReS}_2$  PV device as measured in dark (black) and illuminated ( $\lambda = 532$  nm, red) conditions.



## 8. Computational methods

All calculations were performed by VASP code according to the density functional theory (DFT)<sup>6,7</sup> with the PBE functional<sup>8</sup> and the projected augmented wave potential method.<sup>9</sup> During the calculation, the unit cell of tetralayer ReS<sub>2</sub> was used and the thickness of vacuum was larger than 15 Å. The energy cutoff for plane-wave basis was set to 500 eV. The atomic structures were relaxed until the forces less than 0.001 eV/Å and the energy less than 10<sup>-5</sup> eV. The reciprocal space is sampled by a grid of 7×7×1 in the Brillouin zone. The polarization intensity was obtained through Berry-phase calculation.<sup>10</sup>

## REFERENCES

- (1) Y. Song, S. Hu, M. L. Lin, X. Gan, P. H. Tan and J. Zhao, *ACS Photonics*, 2018, **5**, 3485–3491.
- (2) J. Wang, N. Han, Z.-D. Luo, M. Zhang, X. Chen, Y. Liu, Y. Hao, J. Zhao and X. Gan, *ACS Nano*, 2022, **16**, 6404–6413.
- (3) J. Wang, M. Zhang, N. Han, Z. Luo, X. Chen, Y. Liu, J. Zhao and X. Gan, *Adv. Opt. Mater.*, 2023, **11**, 2202495.
- (4) X. F. Qiao, J. Bin Wu, L. Zhou, J. Qiao, W. Shi, T. Chen, X. Zhang, J. Zhang, W. Ji and P. H. Tan, *Nanoscale*, 2016, **8**, 8324–8332.
- (5) D. Yang, J. Wu, B. T. Zhou, J. Liang, T. Ideue, T. Siu, K. M. Awan, K. Watanabe, T. Taniguchi, Y. Iwasa, M. Franz and Z. Ye, *Nat. Photonics*, 2022, **16**, 469–474.
- (6) G. Kresse and J. Furthmüller, *Comput. Mater. Sci.*, 1996, **6**, 15–50.

- (7) G. Kresse and J. Furthmüller, *Phys. Rev. B - Condens. Matter Mater. Phys.*, 1996, **54**, 11169–11186.
- (8) J. P. Perdew, K. Burke and M. Ernzerhof, *Phys. Rev. Lett.*, 1996, **77**, 3865–3868.
- (9) P. E. Blöchl, *Phys. Rev. B*, 1994, **50**, 17953–17979.
- (10) R. Fei, W. Kang and L. Yang, *Phys. Rev. Lett.*, 2016, **117**, 097601.
