# Supplementary figures and images for: A giant intrinsic photovoltaic effect in atomically thin ReS2
Source: Royal Society of Chemistry journal article supplement (doi:10.1039/d3nr05355e), 2024-01-01

a

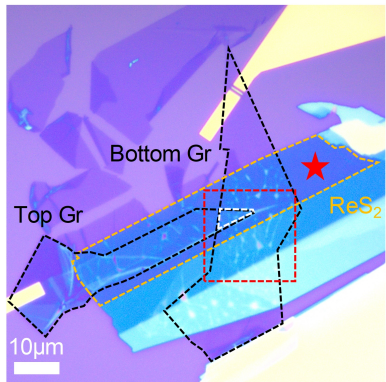

b

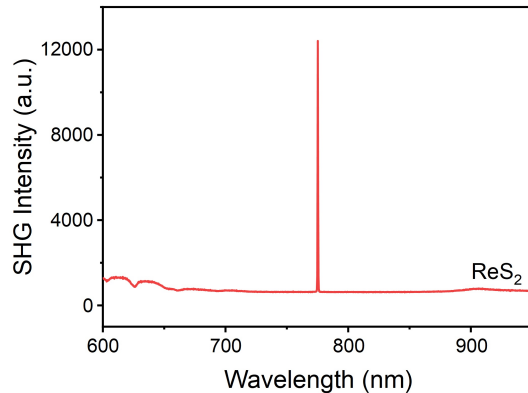

Supplement: d3nr05355e3.pdf [file d3nr05355e3.pdf]

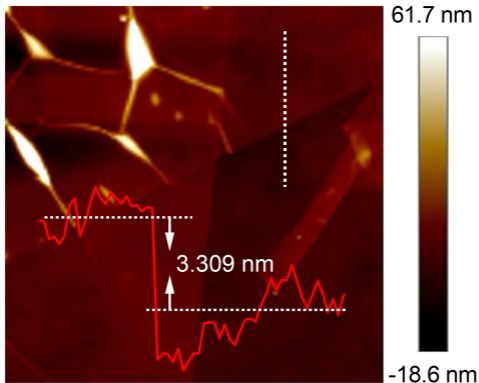

Supplement: d3nr05355e4.pdf [file d3nr05355e4.pdf]

a

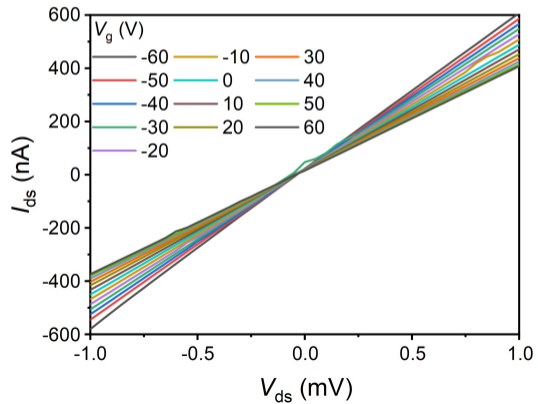

b

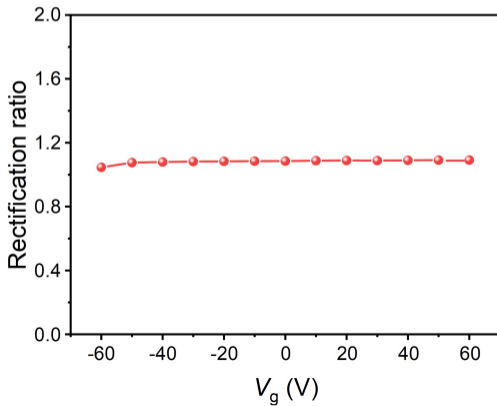

Supplement: d3nr05355e5.pdf [file d3nr05355e5.pdf]

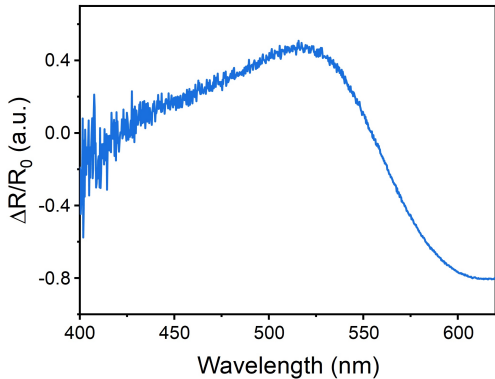

Supplement: d3nr05355e6.pdf [file d3nr05355e6.pdf]

**a**

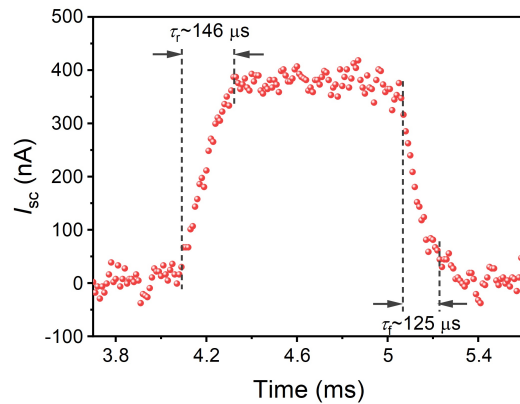

**b**

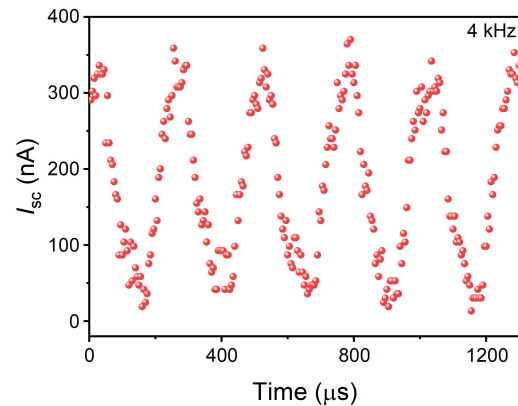

**c**

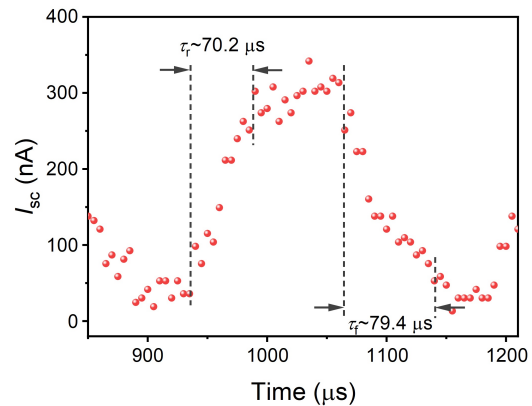

Supplement: d3nr05355e7.pdf [file d3nr05355e7.pdf]

a

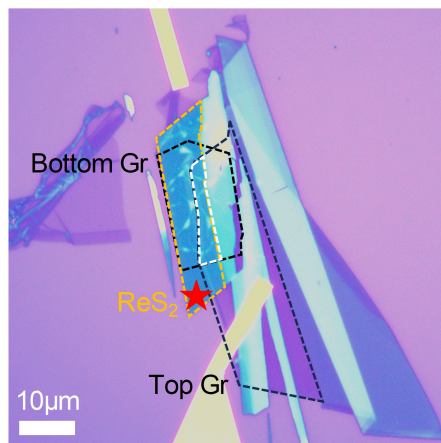

b

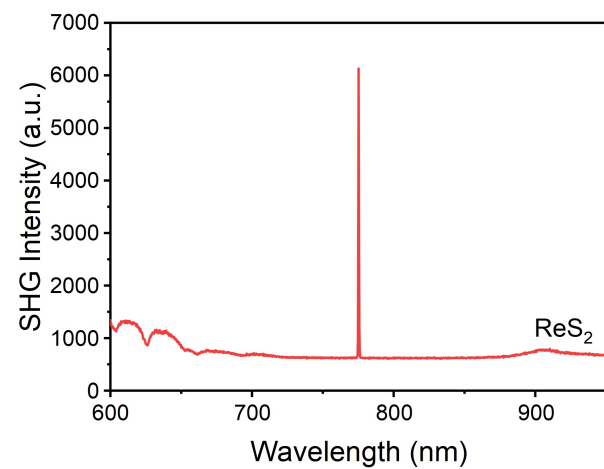

c

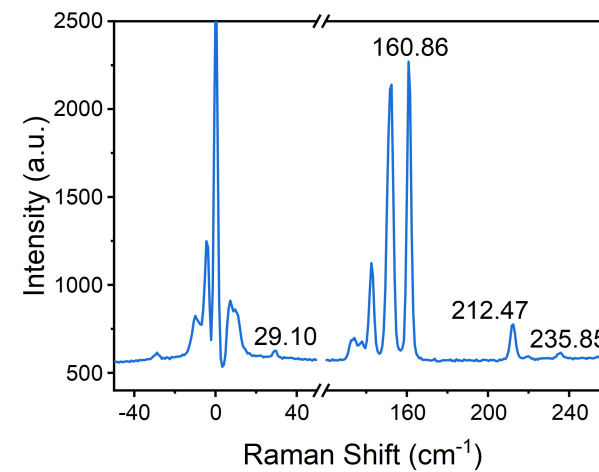

d

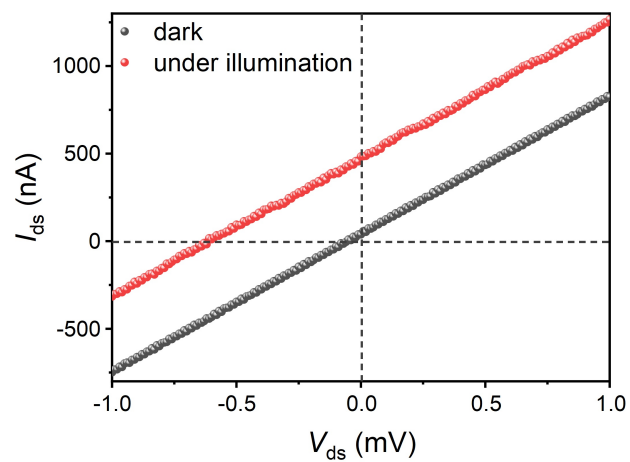

e

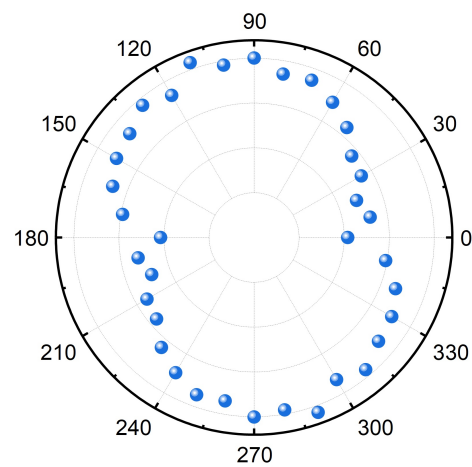

f

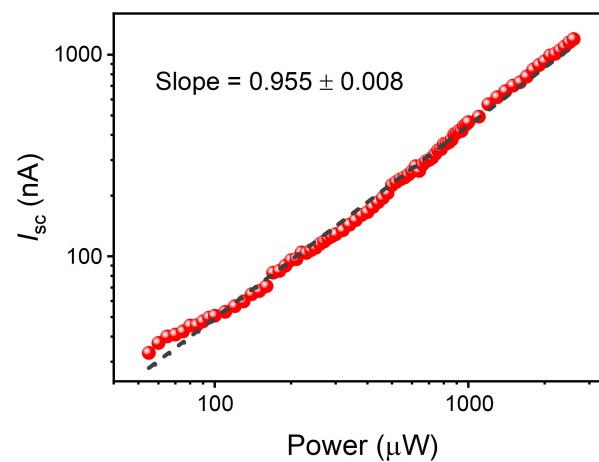

Supplement: d3nr05355e8.pdf [file d3nr05355e8.pdf]

a

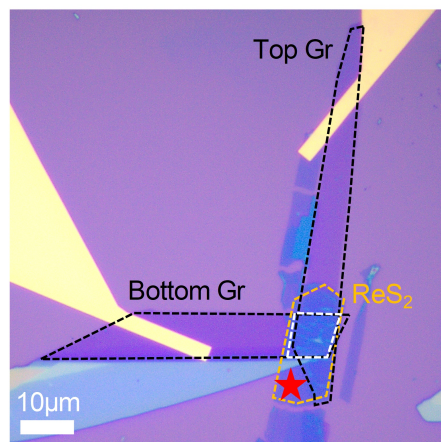

b

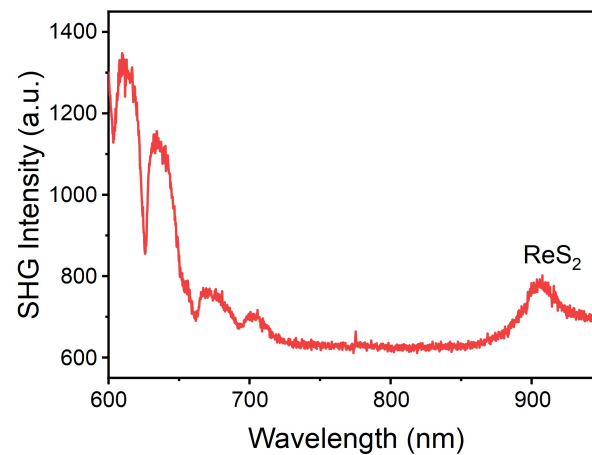

c

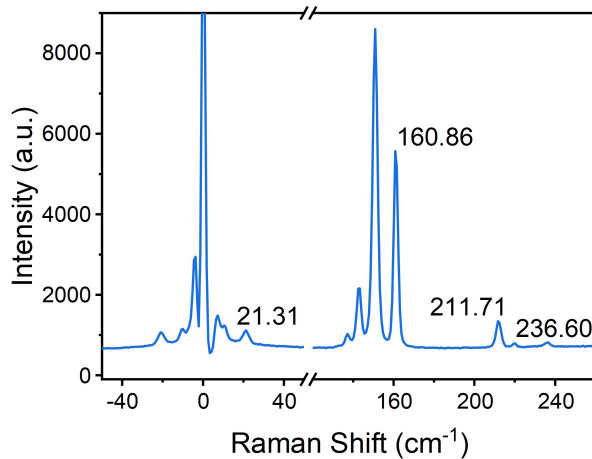

d

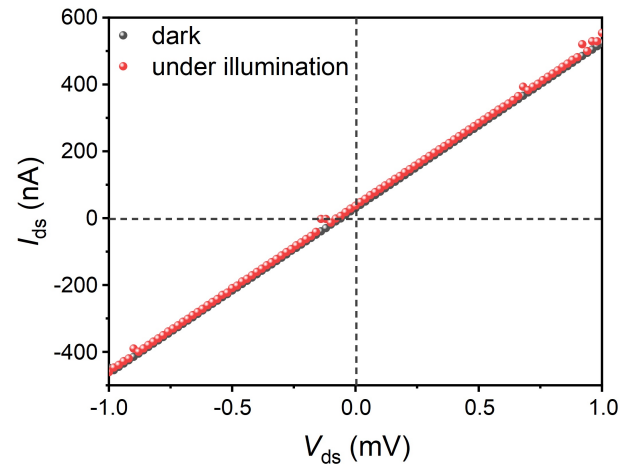

Supplement: d3nr05355e9.pdf [file d3nr05355e9.pdf]
